# Supplementary material for: Donepezil for the Treatment of Agitation in Alzheimer's Disease
Source: Atypon-hosted journal article supplement (doi:10.1056/nejmoa066583), 2007-10-03

## Supplementary Appendix

This appendix has been provided by the authors to give readers additional information about their work.

Supplement to: Howard RJ, Juszcak E, Ballard CG, et al. Donepezil for the treatment of agitation in Alzheimer's disease. *N Engl J Med* 2007;357:1382-92.

## **Online Only Appendix. Sensitivity Analyses**

Sensitivity analyses were carried out on the following basis to examine robustness of conclusions to different assumptions about departures from randomised policies, depending on the availability of data, the particular set of circumstances and various other ways of handling missing data:

1. Computing total scores for those patients with  $\geq 90\%$  assessment items completed
2. Computing total scores using valid domains as the denominator (pro rata score)
3. Either replacing T0 (baseline) data with T-4 (trial entry) data if T(0) baseline assessment was more than 2 days post randomisation or the date of assessment was missing OR removing those assessments if no T-4 assessment scheduled or the date of assessment was missing.
4. Increasing the number of patients with complete 'change in outcome' data by imputing last observation carried forward (LOCF); T+4 (dose escalation assessment) or dropout assessment, whichever came later.

### In addition for the primary outcome only:

1. Performing a repeated measures (linear mixed effect model), taking into account the multiple outcome measurements made.
2. Restricting analysis to those patients who started treatment.
3. Making partially complete assessments complete by using simple imputation methods:

- a. Imputing middle (neutral) value for missing item=4
- b. Imputing treatment group mean value for that missing item

## Online Only Appendix. Sensitivity analyses for primary outcome (Total CMAI)

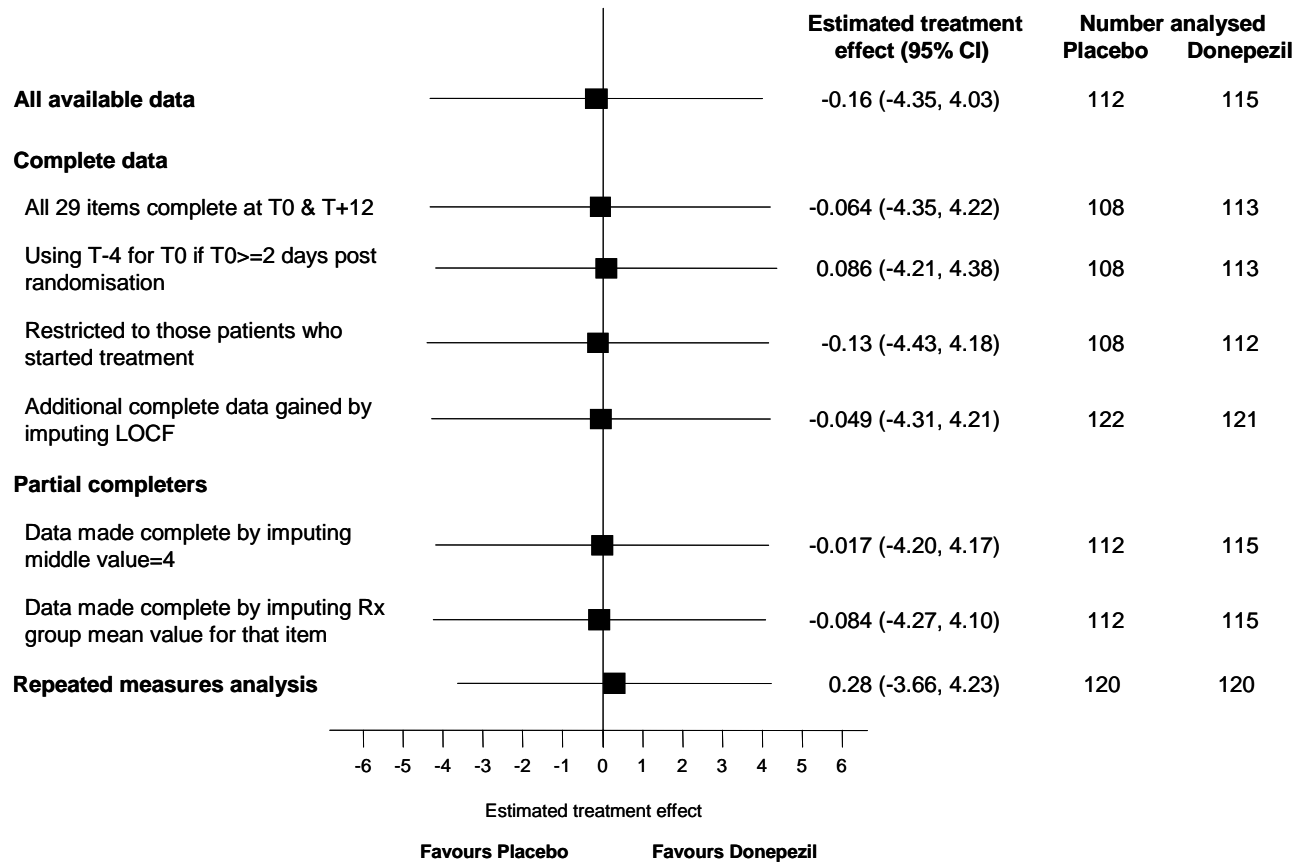

Supplement: nejm_howard_1382sa1.pdf [file nejm_howard_1382sa1.pdf]
